# Supplementary material for: Dietary flavone chrysin (5,7-dihydroxyflavone ChR) functionalized highly-stable metal nanoformulations for improved anticancer applications
Source: Royal Society of Chemistry journal article supplement (doi:10.1039/c5ra15060d), 2015-01-01
Supplement: c5ra15060d1.pdf [file c5ra15060d1.pdf]

**ELECTRONIC SUPPLEMENTARY INFORMATION**

**Dietary flavone chrysin (5,7-dihydroxyflavone ChR) functionalized highly-stable metal  
nanoformulations for improved anticancer applications**

G. Sathishkumar,<sup>a</sup> Rashmi Bharti,<sup>b</sup> Pradeep K. Jha,<sup>b</sup> M. Selvakumar,<sup>c</sup> Goutam Dey,<sup>b</sup> Rakhi Jha,<sup>b</sup>  
M. Jeyaraj,<sup>d</sup> Mahitosh Mandal<sup>b</sup> and S. Sivaramakrishnan<sup>\*a</sup>

**Fig. S1**

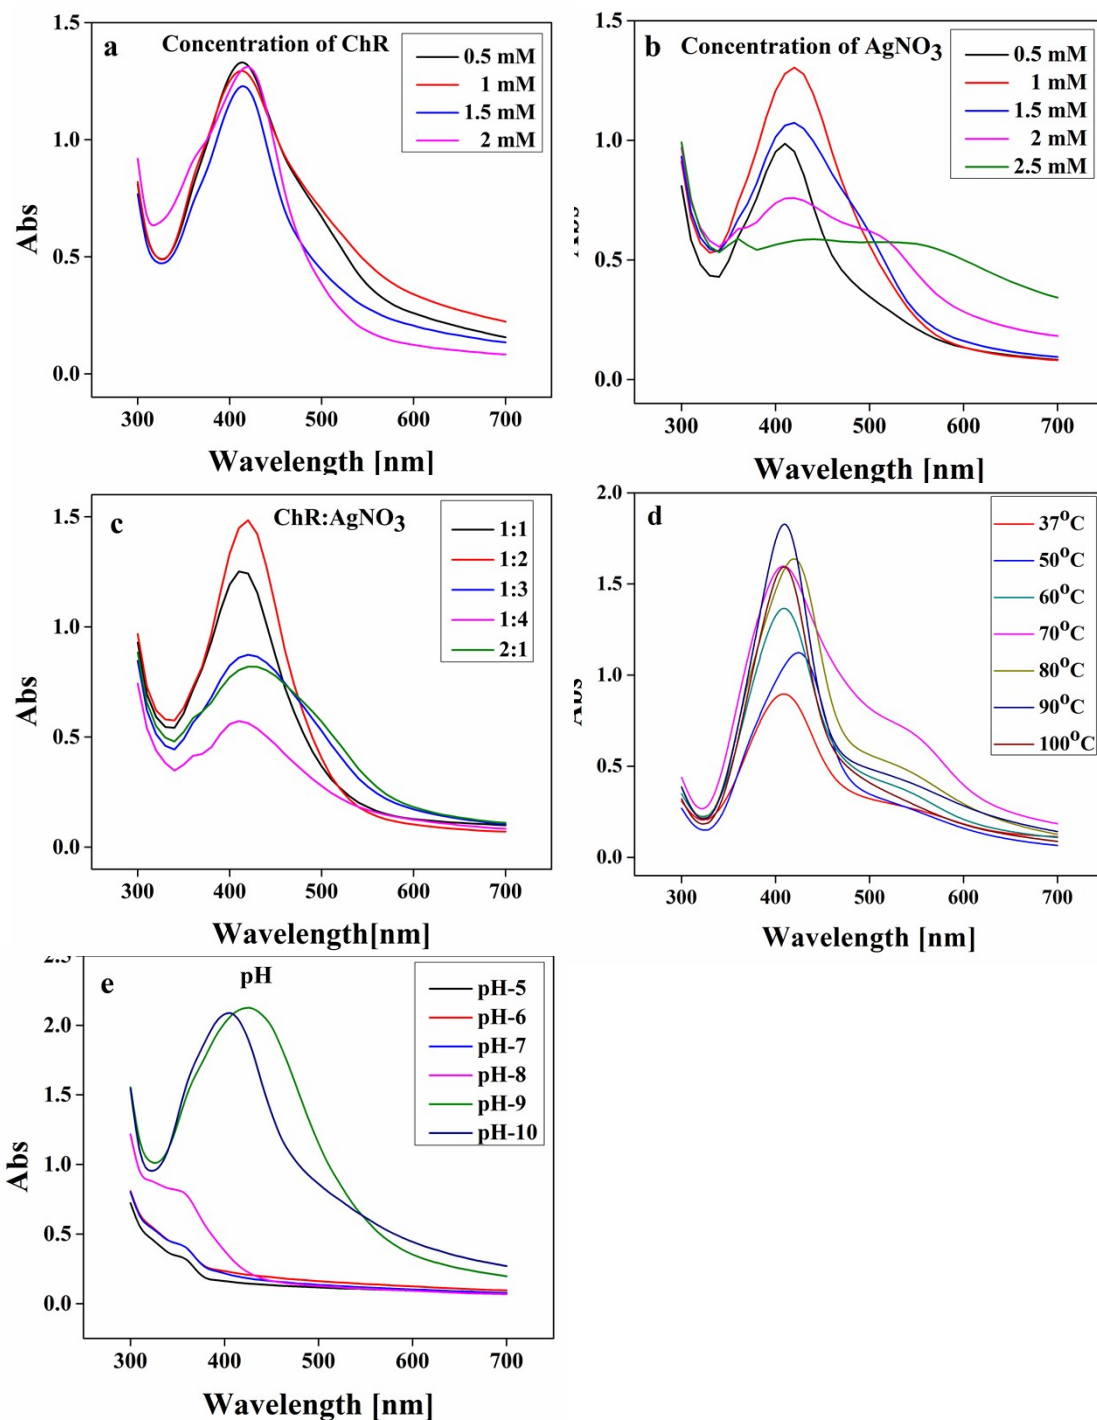

**Fig. S1.** Influence various reaction kinetics to control over the size, shape of ChR-AgNPs synthesized using ChR. (a) Effect of ChR concentration, (b) Effect of metal ion (AgNO<sub>3</sub>) concentration, (c) Effect of stoichiometric proportion of reaction mixture, (d) Effect of temperature and (e) Effect of pH.

**Fig. S2**

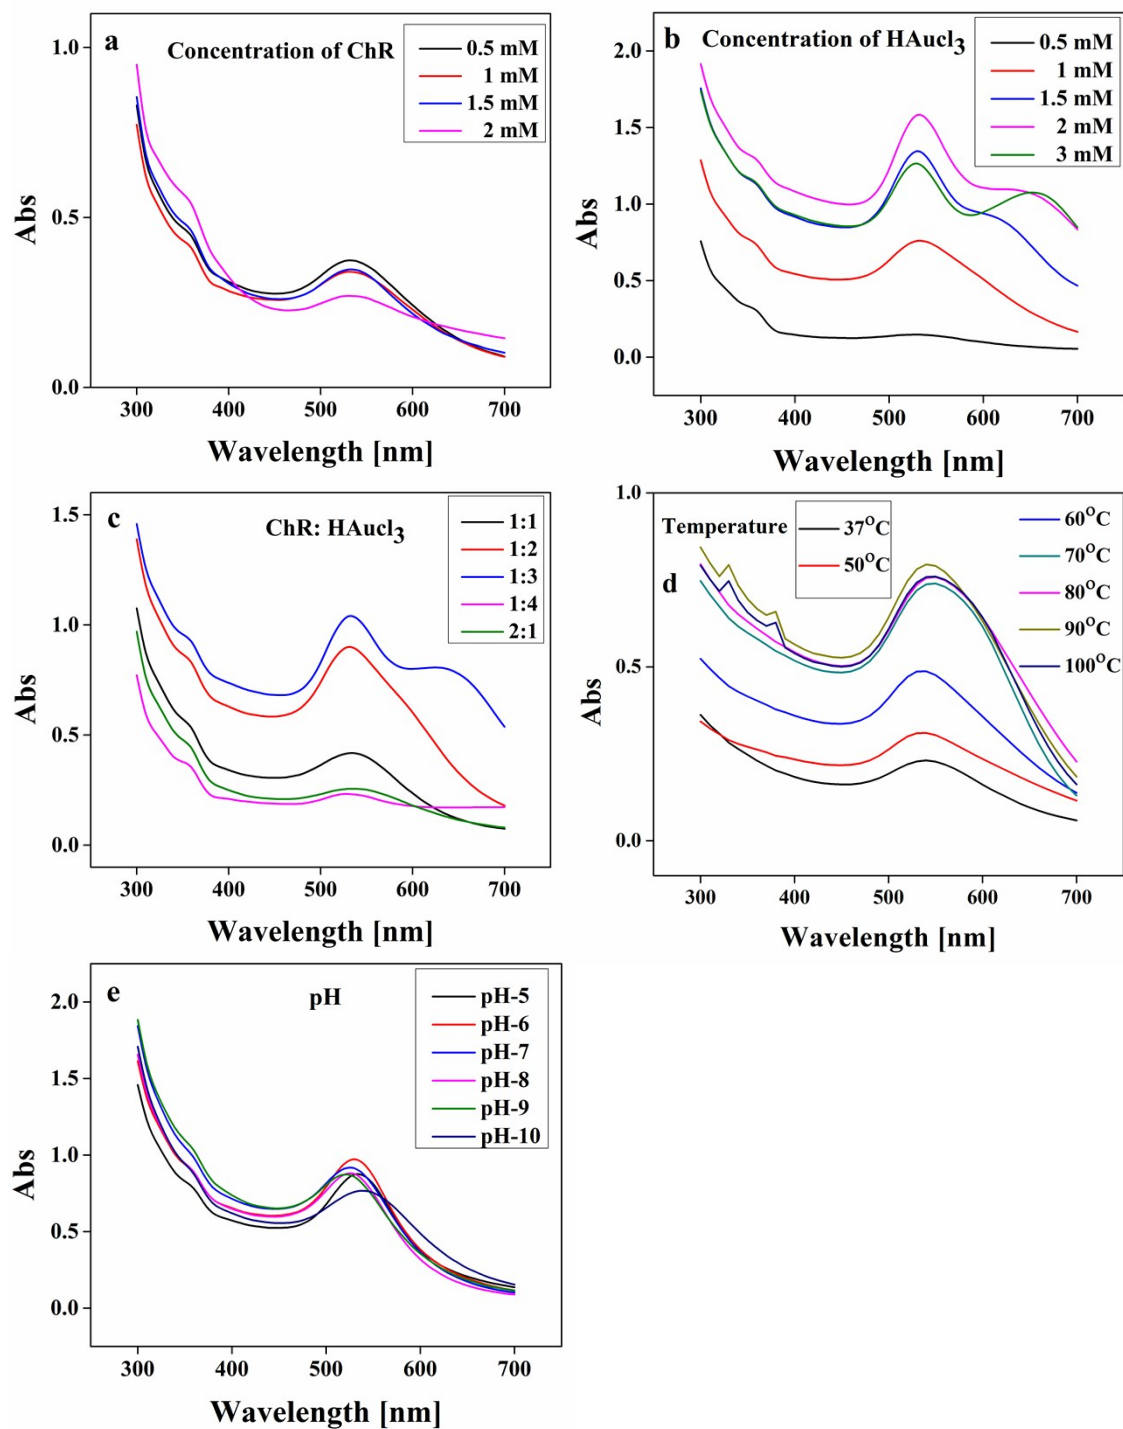

**Fig. S1.** Influence various reaction kinetics to control over the size, shape of ChR-AuNPs synthesized using ChR. (a) Effect of ChR concentration, (b) Effect of metal ion (HAuCl<sub>4</sub>) concentration, (c) Effect of stoichiometric proportion of reaction mixture, (d) Effect of temperature and (e) Effect of pH.

**Fig. S3**

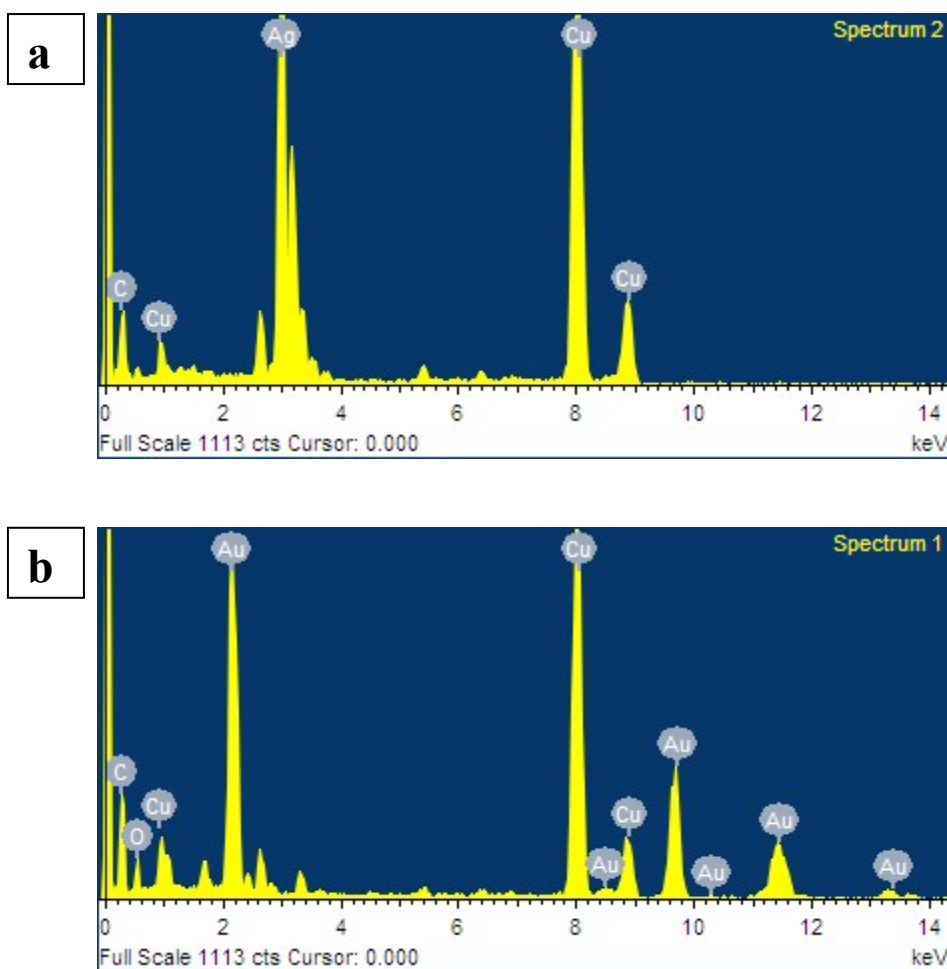

**Fig. S3** EDAX analysis shows strong signal for metals (a) Ag and (b) Au respectively indicates the purity and stability of synthesized NPs

**Fig. S4**

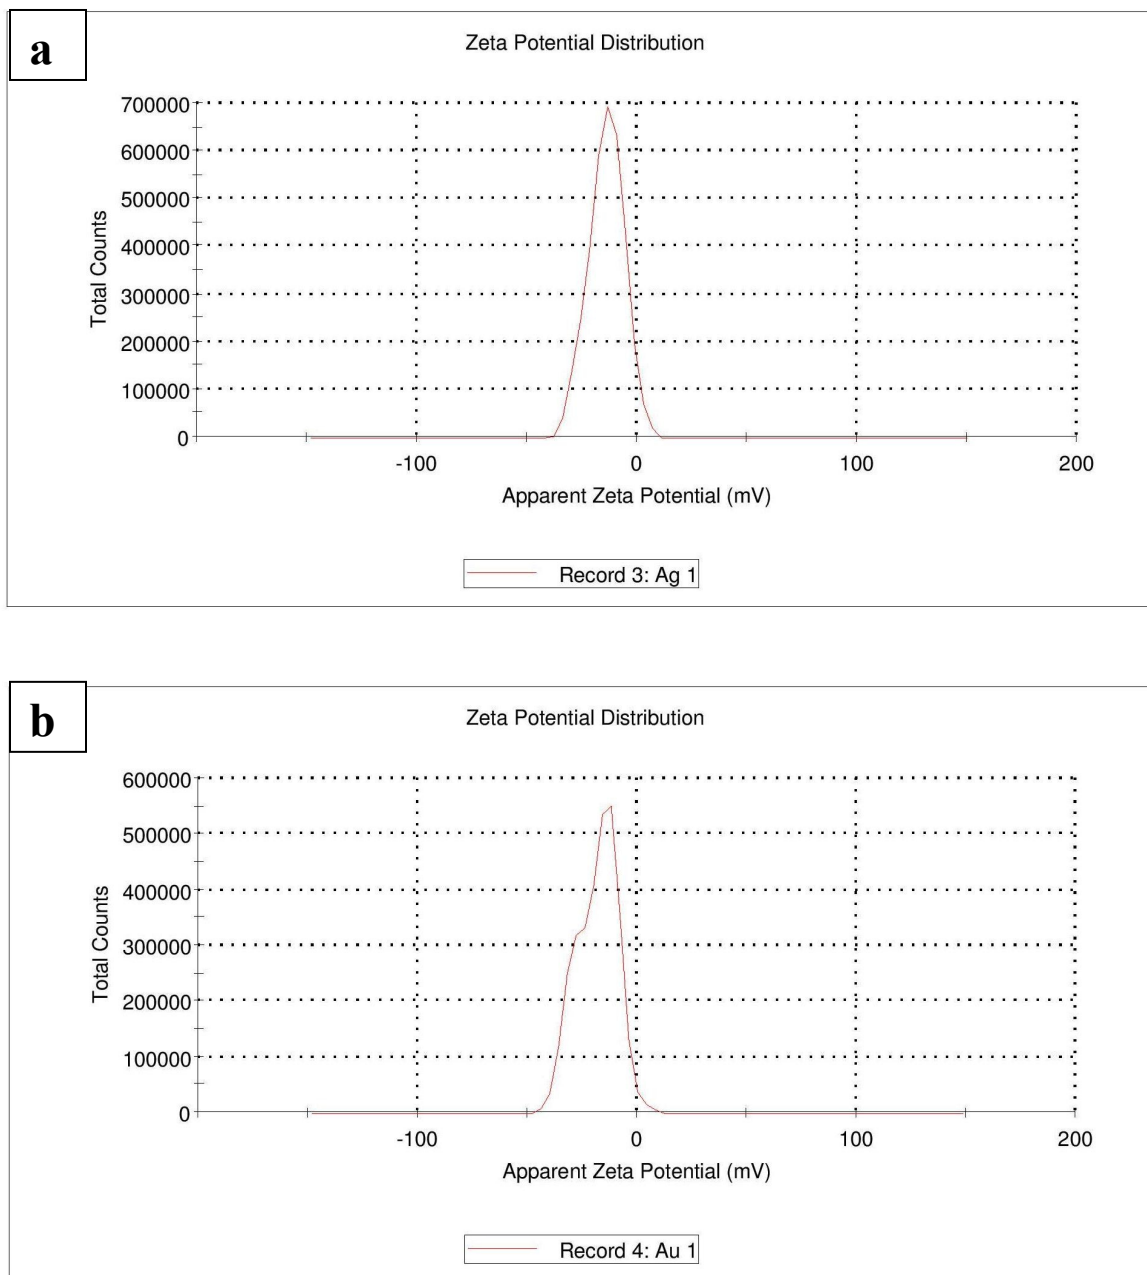

**Fig. S4** Zeta potential analysis displays negative value for both (a) ChR-AgNPs and (b) ChR-AuNPs
